1 Acute intermittent hypoxia in people living with chronic stroke – a preliminary study to  
2 examine safety and efficacy as a neurorehabilitation intervention.

3

4 Gregory EP Pearcey<sup>1,2</sup>, Alexander J Barry<sup>3</sup>, Milap S Sandhu<sup>2,3</sup>, Timothy Carroll<sup>4</sup>, Elliot J  
5 Roth<sup>2,3</sup>, and W Zev Rymer<sup>2,3</sup>

6

7 1. Memorial University of Newfoundland

8 2. Northwestern University

9 3. Shirley Ryan Ability Lab

10 4. University of Chicago

11

12 Correspondence:

13 Gregory Pearcey: [gearcey@mun.ca](mailto:gearcey@mun.ca)

14 Z Rymer: [zrymer@sralab.org](mailto:zrymer@sralab.org)

15 **ABSTRACT**

16

17 **Background and Purpose:** Acute intermittent hypoxia (AIH) is a novel therapeutic  
18 intervention that has the potential to facilitate recovery of function, but its safety and  
19 efficacy have not been tested in people with stroke. The purpose here was to examine  
20 whether AIH is safe and effective in people with stroke.

21

22 **Methods:** Participants (n=10) with a unilateral, ischemic, hemispheric stroke were  
23 assessed before and following 4 sessions of AIH. Clinical tests and upper limb strength  
24 were assessed before, ~15-30 minutes, and ~60 minutes after the intervention.

25

26 **Results:** AIH was well-tolerated and there were no adverse events observed. Although  
27 no changes in strength were detected for the less-affected limb, grip strength and elbow  
28 flexion force of the more-affected limb was increased after AIH.

29

30 **Conclusions:** AIH appears to be potentially safe and effective for improving strength in  
31 the more-affected limb in people with stroke. Future work should explore the use of AIH  
32 to enhance task-specific training-induced plasticity.

## 33 INTRODUCTION

34  
35 Stroke is a leading cause of long-term disability worldwide. Despite some spontaneous  
36 recovery following a stroke, many people with stroke show substantial residual functional  
37 impairments that significantly affect their independence and quality of life. Novel  
38 interventions to alleviate impairment in people with stroke are urgently needed. Several  
39 therapies promote strength and endurance, but few capitalize on the unique potential of  
40 the central nervous system to reorganize following injury.

41  
42 Acute intermittent hypoxia (AIH), a protocol that involves brief respiratory exposure to  
43 reduced oxygen concentrations, has been found to augment neuroplasticity and promote  
44 functional recovery after spinal cord injury (SCI)<sup>1</sup>. Although the pathology of stroke differs  
45 from SCI, stroke is often accompanied by damage to white matter projections. Therefore,  
46 there is great potential for similar therapeutic benefits arising from transient reductions in  
47 oxygen on damaged cerebral projections. Published results in people with SCI have  
48 shown enhanced strength and coordination rather quickly after AIH, which opens a  
49 temporary window for enhanced neuroplasticity after a single intervention<sup>2</sup>.

50  
51 The purpose of this study was to investigate the safety and efficacy of AIH in people with  
52 stroke. The objectives were two-fold, to examine whether brief reductions in inhaled  
53 oxygen 1) are safely tolerated, and 2) improve upper limb strength. We hypothesized that  
54 AIH would be safely tolerated and increase strength on the more affected side.

## 55 METHODS

### 56 *Participants*

57  
58 Sixteen people were recruited and consented to complete the study, but only 10/16  
59 completed all procedures. Data are thus reported on 10 individuals (58.2±5.8 years, 2  
60 females) living with chronic stroke (10.4±7.1 years since injury). The remaining 6  
61 participants were either withdrawn due to resting heart rates <50 bpm, dropped out due  
62 to positive tests for Covid-19, or did not qualify following the screening session. The  
63 experimental protocol was registered (NCT04019522) and participants provided informed  
64 and written consent to procedures approved by the local ethics committee at  
65 Northwestern University (IRB protocol STU00208610).

### 66 *Experimental sessions*

67  
68  
69 Participants attended a free-standing academic rehabilitation hospital for six visits. The  
70 first visit was a baseline assessment, which included a structural magnetic resonance  
71 imaging (MRI) scan; a medical history, demographics, and medications; a pregnancy test  
72 for women of childbearing potential; performance of the outcome assessments; medical  
73 monitoring; and a blood draw. The next four sessions had a consistent format, but the  
74 level of inspired oxygen during AIH was modified from 21% (i.e., room air) in the first  
75 session, reduced by 4% each session to reach 9% in the final experimental session. In  
76 each experimental session, participants performed outcome assessments before and  
77  
78

79 after 15 sequences of brief oxygen reductions while vital functions were monitored. After  
80 AIH, blood was drawn, and a neurological assessment was performed by a trained  
81 physician. Each visit was separated by at least 48 hours. The final visit was a follow-up  
82 assessment, which included a structural MRI scan; performance of the outcome  
83 assessments; medical monitoring; and a blood draw.

84

### 85 ***AIH intervention***

86

87 Each session utilized a customized Hyp-123 device (Hypoxico, Gardiner, NY) to switch  
88 between hypoxic air and normoxic air. Participants breathed lowered O<sub>2</sub> concentrations  
89 for 30-60 seconds, followed immediately by breathing room air for 60-90 seconds, and  
90 this was repeated for 15 cycles. The total duration of each intervention was approximately  
91 30 minutes and O<sub>2</sub> concentrations were monitored with a Maxtec Handi+ oxygen analyzer  
92 (Maxtec, Salt Lake City, UT).

93

94 Since this was the first study using the AIH protocol in people with stroke, a titration  
95 approach was used for the O<sub>2</sub> concentrations across sessions and was decreased along  
96 the above-mentioned schedule. This allowed the capacity for monitoring participants for  
97 adverse events while slowly increasing the hypoxia levels to identify any potential issues.  
98 A side effect questionnaire was given before, during, and after AIH where participants  
99 were instructed to inform study staff if they experienced any notable changes.

100

### 101 ***Physiological monitoring***

102

103 Participants oxygen saturation levels (SpO<sub>2</sub>) and heart rate were monitored with a Nonin  
104 7500 SpO<sub>2</sub> monitor (Nonin Medical Inc., Plymouth, MN), and a 5-lead electrocardiogram  
105 was read in real time by a registered nurse. Blood pressure was measured before, during,  
106 and after the interventions.

107

### 108 ***Outcome Assessments***

109

#### 110 ***Clinical assessments***

111

112 At their first visit, all participants underwent a battery of clinical assessments, prior to AIH  
113 administration. A medical history was taken by the physician to confirm that the participant  
114 met inclusion and exclusion criteria and that there were no other co-morbidities.  
115 Participants underwent a structural brain MRI before the intervention to confirm size and  
116 location of the stroke lesion, and after the intervention to determine whether the stroke  
117 lesion size changed. Participants then received a 12-lead EKG assessment at rest, which  
118 the study physician used to identify whether cardiac abnormalities were present prior to  
119 intervention. A baseline blood draw was assessed for Troponin levels, and a second  
120 blood draw was assessed for Troponin levels after each intervention session, before each  
121 participant was discharged.

122

123 Prior to and following each intervention, a trained clinician performed: neurological  
124 assessments to determine whether there were changes in cognition (NIH Stroke Scale,

125 a measure of stroke severity); cranial nerve assessment; a standard muscle strength test;  
126 the Brunnstrom scale to assess level of motor recovery; sensory changes; reflexes;  
127 coordination; assessment of heart and lung status; Fugl-Meyer test, a quantitative  
128 measure of motor impairment; Chedoke McMaster Stroke Assessment, a measure of  
129 impairment of the hand; Modified Ashworth Scale for Spasticity, and Delis Kaplan  
130 Executive Function System Color-Word Interference Test, an assessment of verbal  
131 processing and executive functioning.

132

### 133 *Strength testing*

134

135 Elbow flexion strength was assessed using a custom elbow dynamometer that utilizes a  
136 TAS510 tension/compression load cell (HTC Sensors, Xi'An, China) to quantify elbow  
137 flexion force. Grip strength was measured using a Jamar analog hand dynamometer  
138 (Jamar Technologies, Hatfield, PA). For both elbow flexion and grip strength, the peak  
139 force obtained during a three second maximal voluntary contraction was recorded. w60  
140 seconds rest was provided before the next trial. A total of three trials of each test was  
141 performed in each limb. The right limb was tested first, followed by the left limb and the  
142 mean of three trials was used for further analysis.

## 143 RESULTS

144

### 145 Safety

146

147 Our primary objective was to determine if AIH is safely tolerated by people with stroke.  
148 Across participants and sessions, there were no adverse consequences observed in  
149 clinical assessments, neurological assessments, or troponin levels after AIH. Participants  
150 tolerated breathing 9% O<sub>2</sub>, which caused SpO<sub>2</sub> to drop to a nadir of  $86.9 \pm 0.9\%$  ( $P < 0.001$ ;  
151 fig.1A) and heart rate to increase by  $7.3 \pm 4.8$  beats per minute ( $P < 0.001$ ; fig.1B).  
152 Significant differences in apparent diffusion coefficient (ADC) values were observed in  
153 the MRI scans but secondary analysis found that voxels with drops in ADC were disjoint  
154 and located on the periphery of the brain. Thus, they were deemed to be a result of  
155 imperfection in the image registration (i.e., noise), further excluding negative  
156 consequences in brain morphology because of the AIH intervention.  
157

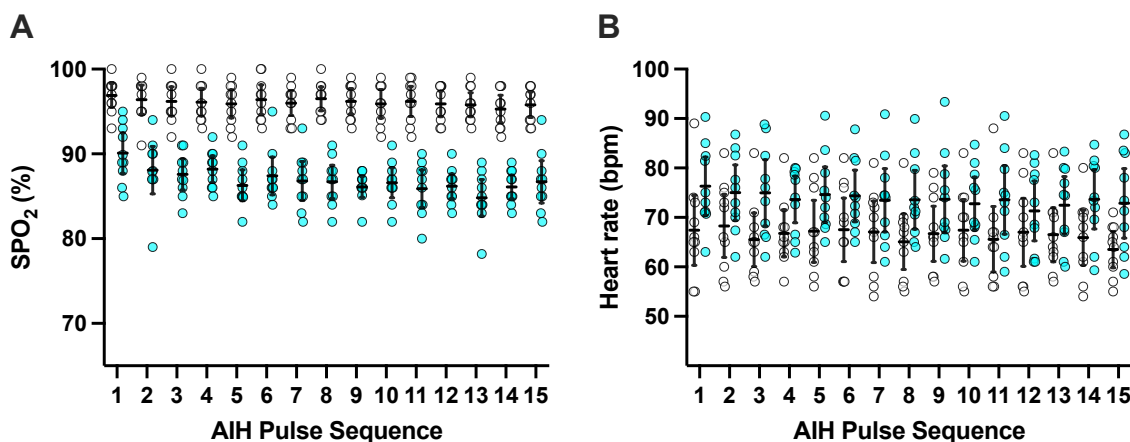

158

159 **Figure 1: Physiological monitoring during acute intermittent hypoxia (AIH).** A) the  
160 nadir oxygen saturation reached during each sequence of AIH. B) the maximum heart  
161 rate reached during each sequence of AIH. In all plots, the 21% O<sub>2</sub> condition is in white,  
162 while the 9% O<sub>2</sub> condition is in cyan. Error bars are 95% confidence limits. All timepoints  
163 were significantly different between conditions in A and B.

164

### 165 Strength

166

167 The secondary objective was to determine if AIH improves strength in the upper limb of  
168 stroke survivors. To account for within-participant variability, we computed the percent  
169 change from baseline during the breathing of 21% and 9% O<sub>2</sub> (AIH). The change in elbow  
170 flexion strength in the more affected limb during the 9% O<sub>2</sub> condition ( $4.92 \pm 3.34\%$   
171 increase from baseline) was significantly greater than the change during the 21% O<sub>2</sub>  
172 condition ( $7.6 \pm 3.34\%$  decrease from baseline;  $p = 0.003$ ; fig.2A). Similarly, in the more  
173 affected limb, the change in grip strength during the 9% O<sub>2</sub> condition ( $12.9 \pm 6.38\%$   
174 increase from baseline) was significantly greater than the change during the 21% O<sub>2</sub>  
175 condition ( $12 \pm 3.81\%$  decrease from baseline;  $p = 0.012$ , fig.2C). The change in grip

176 strength and elbow flexion strength from baseline was not different between conditions in  
177 the less affected limb (fig.2B and 2D).  
178

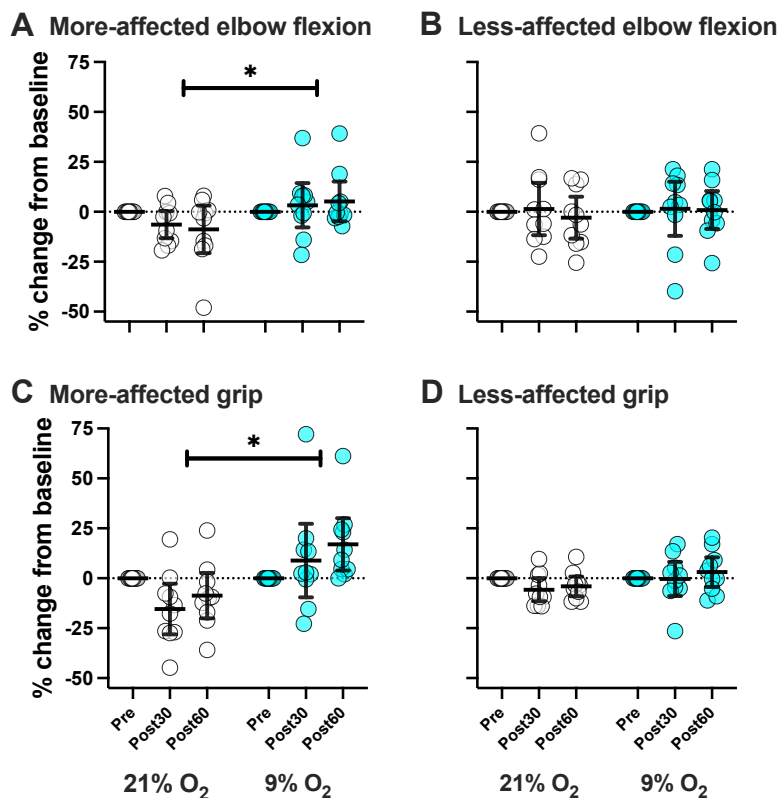

179  
180

181 **Figure 2: Percent change in strength.** A) more-affected elbow flexion, B) less-affected  
182 elbow flexion, C) more-affected grip, and D) less-affected grip. The 21% O<sub>2</sub> condition is  
183 white, the 9% O<sub>2</sub> condition is cyan, error bars are 95% confidence limits, and \* indicates  
184  $p < 0.05$  for the effect of condition.

185 **DISCUSSION**

186  
187 The primary purpose of this preliminary study was to investigate the safety of AIH in  
188 chronic hemispheric stroke survivors. Our secondary objective was to determine if AIH  
189 augments volitional strength after stroke. In support of our first objective, we showed that  
190 AIH was tolerated without negative consequences. The observed ~5 and ~13% increase  
191 in volitional strength of the hand and elbow musculature supports the assertion proposed  
192 in our second objective, that AIH can improve volitional strength after stroke. The  
193 mechanisms underlying the increases in strength remain speculative but might include  
194 synaptic plasticity<sup>3</sup>, and/or improved neural drive to the motor pool<sup>4</sup>, which improves  
195 motor unit output<sup>5</sup>.

196  
197 Several limitations should be acknowledged: The sample size was small, and although  
198 we did not observe any adverse events, medical monitoring will be important in future  
199 trials. Additionally, we only administered a single bout of AIH to these individuals, and the  
200 cumulative effects of hypoxia must be monitored. Repetitive AIH may enhance  
201 neuroplasticity, and thus may provide greater therapeutic benefit than a single session<sup>2</sup>.

202  
203 **Conclusions**

204  
205 Our findings suggest that AIH is potentially safe and effective for improving limb function  
206 in people with stroke. Although AIH is a promising intervention, further investigation is  
207 required to confirm safety and to maximize therapeutic outcomes.



208 **Acknowledgements**

209 Thanks to Leah O'Shea for assisting data collection and analysis, Deena Hasselballa for  
210 help with neurological assessments, and the nurses for monitoring vitals.

211

212 **Sources of Funding**

213 This study was supported by the American Heart Association (AHA GRANT  
214 #18IPA34170025).

215

216 **Disclosures**

217 The authors have nothing to disclose, financial or otherwise.

218 **References**

219

220 1. Vose AK, Welch JF, Nair J, Dale EA, Fox EJ, Muir GD, Trumbower RD, Mitchell GS.  
221 Therapeutic acute intermittent hypoxia: A translational roadmap for spinal cord injury  
222 and neuromuscular disease. *Exp Neurol*. 2022;347:113891.

223 2. Welch JF, Sutor TW, Vose AK, Perim RR, Fox EJ, Mitchell GS. Synergy between  
224 Acute Intermittent Hypoxia and Task-Specific Training. *Exerc Sport Sci Rev*.  
225 2020;48:125–132.

226 3. Christiansen L, Urbin MA, Mitchell GS, Perez MA. Acute intermittent hypoxia  
227 enhances corticospinal synaptic plasticity in humans. *Elife*. 2018;7:e34304.

228 4. Afsharipour B, Pearcey GEP, Rymer WZ, Sandhu MS. Acute intermittent hypoxia  
229 enhances strength, and modulates spatial distribution of muscle activation in  
230 persons with chronic incomplete spinal cord injury. *Experimental Neurology*.  
231 2023;367:114452.

232 5. Pearcey GEP, Afsharipour B, Holobar A, Sandhu MS, Rymer WZ. Acute intermittent  
233 hypoxia-induced increases maximal motor unit discharge rates in people with  
234 chronic incomplete spinal cord injury. *medRxiv*. 2023. Available from:  
235 <https://www.medrxiv.org/content/10.1101/2023.05.22.23290235v1>

236
